# Supplementary material
Source: publisher figshare collection journal article supplement (https://sage.figshare.com/ndownloader/files/13102709)
Supplement: Supplementary file 1 [file 13102709]

| Reference number as appears in main text | Author (year)         | PEDro score | Participants                                                                                                                                                                 | Diagnosis/ classification                                                                                                                                                                                                                                                                     |
|------------------------------------------|-----------------------|-------------|------------------------------------------------------------------------------------------------------------------------------------------------------------------------------|-----------------------------------------------------------------------------------------------------------------------------------------------------------------------------------------------------------------------------------------------------------------------------------------------|
| 29                                       | Abrisham et al (2011) | 9           | N = 80; mean age = 51.7 years; proportion male = 30/80 (38%); mean duration of symptoms = not reported                                                                       | <b>Subacromial syndrome, defined by:</b> Subacromial syndrome, defined by: Subacromial Shoulder pain<br>+ve Neer, Hawkins-Kennedy, Jobe and Speed's test<br>No imaging reported                                                                                                               |
|                                          | Akgun et al (2004)    | 8           | N = 48; mean age = 48.8 years; proportion male = 15/48 (31%); mean duration of symptoms = 14.7 months                                                                        | <b>Subacromial impingement syndrome, defined by:</b> Subacromial impingement syndrome, defined by: Subacromial impingement syndrome<br>Unilateral shoulder pain<br><br>+ ve Neer, Hawkins-Kennedy test, Painful arc<br>Normal x-ray                                                           |
| 30                                       | Aktas et al (2007)    | 8           | 46 participants, divided into 2 groups. Mean ages $\pm$ SD in the two groups were 48.7 $\pm$ 9.0 and 53.9 $\pm$ 11.2,. 15 female-5 male patients in each group. 6 drop-outs. | <b>Subacromial impingement syndrome, defined by:</b> Subacromial impingement syndrome, defined by: Subacromial impingement syndrome<br>unilateral shoulder pain<br><br>+ ve Neer, Hawkins-Kennedy test, painful arc, + ve injection test<br><br>Normal x-ray, MRI consistent with impingement |
| 31                                       | Akyol et al (2012)    | 8           | 40 subjects, divided into 2 groups of 20. 30 female-10 male, age range 21-78 years.                                                                                          | <b>Subacromial impingement syndrome, defined by:</b> Subacromial impingement syndrome, defined by: Subacromial impingement syndrome<br>Shoulder pain<br><br>+ ve Neer, Hawkins-Kennedy test, painful arc<br>MRI consistent with impingement                                                   |

|    |                        |   |                                                      |                                                                                                                                                                                                                                                                      |
|----|------------------------|---|------------------------------------------------------|----------------------------------------------------------------------------------------------------------------------------------------------------------------------------------------------------------------------------------------------------------------------|
| 32 | <b>Al Dajah (2014)</b> | 4 | 30 subjects, divided into 2 groups of 15. Ages 40-60 | <p>Subacromial impingement syndrome, defined by: Subacromial impingement syndrome, defined by: Subacromial impingement syndrome, defined by:</p> <p>Shoulder pain VAS <math>\geq 5</math></p> <p>+ ve Neer, - ve capsule stretch test</p> <p>No imaging reported</p> |
|----|------------------------|---|------------------------------------------------------|----------------------------------------------------------------------------------------------------------------------------------------------------------------------------------------------------------------------------------------------------------------------|

|    |                            |   |                                                            |                                                                                                                                                                                                                                                                                            |
|----|----------------------------|---|------------------------------------------------------------|--------------------------------------------------------------------------------------------------------------------------------------------------------------------------------------------------------------------------------------------------------------------------------------------|
| 33 | <b>Analan et al (2015)</b> | 6 | 22 patients (11 males, 11 females; age range, 52–81 years) | <p><b>Rotator cuff disease, defined by:</b> Rotator unilateral shoulder pain</p> <p>+ ve results in the Speed, Neer, or Hawkins tests or the drop arm, lift-off, or supraspinatus isolation tests; a resistant, painful shoulder during internal and external rotation; or painful arc</p> |
|----|----------------------------|---|------------------------------------------------------------|--------------------------------------------------------------------------------------------------------------------------------------------------------------------------------------------------------------------------------------------------------------------------------------------|

|    |                                 |   |                                                                |                                                                                                                                                                                                                                                                                                                                                                 |
|----|---------------------------------|---|----------------------------------------------------------------|-----------------------------------------------------------------------------------------------------------------------------------------------------------------------------------------------------------------------------------------------------------------------------------------------------------------------------------------------------------------|
| 34 | <b>Arias-Buria et al (2015)</b> | 7 | N = 36; Divided into 2 groups. Mean age = 58 year. 3/4 Females | <p>MRI consistent with impingement</p> <p><b>Subacromial pain syndrome</b>, defined by:</p> <p>Shoulder pain <math>\geq 3/12</math></p> <p>VAS &gt;4 on NPRS during arm elevation; at least one positive test of Hawkins-Kennedy test, Neer's sign, empty can test, drop arm, and lift-off test</p> <p>+ve rotator cuff / supraspinatus tendinopathy on MRI</p> |
|----|---------------------------------|---|----------------------------------------------------------------|-----------------------------------------------------------------------------------------------------------------------------------------------------------------------------------------------------------------------------------------------------------------------------------------------------------------------------------------------------------------|

|    |                    |   |                                                                                 |                                                                                                                                                                                                                                                                                                                                                                                                                                                                             |
|----|--------------------|---|---------------------------------------------------------------------------------|-----------------------------------------------------------------------------------------------------------------------------------------------------------------------------------------------------------------------------------------------------------------------------------------------------------------------------------------------------------------------------------------------------------------------------------------------------------------------------|
| 36 | <b>Atya (2012)</b> | 6 | 40 subjects, divided into 2 groups of 19 (mean age = 48) and 21 (Mean age = 49) | <p><b>Subacromial impingement, defined by:</b> Subacromial impingement, defined by: Subacromial impingement, defined by:</p> <p>superiolateral shoulder pain &gt; 5 VAS</p> <p>+ ve Neer, Hawkins-Kennedy test, painful arc, pain or limitation with the functional movement patterns of hand- behind-back or hand-behind-head, pain with one of the following resistance tests: external rotation, internal rotation, abduction, or flexion</p> <p>No imaging reported</p> |
|----|--------------------|---|---------------------------------------------------------------------------------|-----------------------------------------------------------------------------------------------------------------------------------------------------------------------------------------------------------------------------------------------------------------------------------------------------------------------------------------------------------------------------------------------------------------------------------------------------------------------------|

|    |                     |   |                                                                             |                                                                                                                                                                                                                                                                                                                                                                       |
|----|---------------------|---|-----------------------------------------------------------------------------|-----------------------------------------------------------------------------------------------------------------------------------------------------------------------------------------------------------------------------------------------------------------------------------------------------------------------------------------------------------------------|
| 37 | Aytar et al (2015)  | 7 | N = 66, 51 females. Mean age = 52 years.                                    | <p>Subacromial impingement syndrome, defined by: Subacromial impingement syndrome, defined by:</p> <p>Shoulder pain</p> <p>At least 3 of positive Neer test, positive Hawkins-Kennedy, positive painful arc, pain with palpation, pain with resisted isometric abduction, pain at the shoulder region.</p> <p>No imaging reported</p>                                 |
| 38 | Bae et al (2011)    | 5 | 35 subject, divided into 2 groups of 17 & 18. 6 males in each group.        | <p><b>Shoulder impingement syndrome</b>, defined by: <b>Shoulder impingement syndrome</b>, defined by:</p> <p>Shoulder pain</p> <p>Painful arc of movement during flexion or abduction, positive Neer or Kennedy-Hawkins impingement signs, or pain on resisted lateral rotation, abduction or the</p> <p>No imaging reported</p>                                     |
| 39 | Bal et al (2009)    | 7 | N = 44, divided into 2 equal groups. 28 females. Age range = 18 - 70 years. | <p><b>Subacromial impingement syndrome, defined by:</b> Subacromial impingement syndrome,</p> <p>Shoulder pain</p> <p>Positive Neer and Hawkins-Kennedy signs, and a positive subacromial injection test</p> <p>No imaging reported</p>                                                                                                                               |
| 40 | Bang & Deyle (2000) | 6 | N = 52. 32 males, 20 females. Age 24 – 65 years. Divided into 2 groups.     | <p><b>Subacromial impingement syndrome</b>, defined by: <b>Subacromial impingement syndrome</b>, defined by:</p> <p>Pain with 1 of these 2 tests: 1. Passive overpressure at full shoulder flexion with the scapula stabilized. 2. Passive internal rotation at 90 deg shoulder flexion in the scapular plane and in progressive degrees of horizontal adduction.</p> |

|    |                         |   |                                                                                                   |                                                                                                                                                                                                                                                           |
|----|-------------------------|---|---------------------------------------------------------------------------------------------------|-----------------------------------------------------------------------------------------------------------------------------------------------------------------------------------------------------------------------------------------------------------|
|    |                         |   |                                                                                                   | And pain with one test from: - Active shoulder abduction or Resisted Abduction or Internal rotation or External rotation.<br>No imaging reported                                                                                                          |
| 42 | Barbosa et al (2008)    | 3 | N = 28. (50:50 M:F) Mean Age = 46.14                                                              | <b>Tendinopathy of Supraspinatus or Biceps Brachii</b> , defined by:<br><br>Pain on palpation of the Supraspinatus or Biceps Brachii tendons<br>+ve in tests for Supraspinatus (e.g Jobe Test) Biceps (e,g Speed Test or Yergason)<br>No imaging reported |
| 43 | Baskurt et al (2006)    | 4 | N = 92. Divided into 3 groups. Average age 56.9 years                                             | <b>Stage I Shoulder Impingement Syndrome</b> , defined by:<br><br>No defined                                                                                                                                                                              |
| 44 | Baskurt et al (2011)    | 5 | N = 40; mean age = 51 years; proportion male = 13/40 (33%); mean duration of symptoms = 10 months | No imaging reported<br><b>Subacromial impingement syndrome, defined by:</b><br>Shoulder pain<br>+ve Neer, Hawkins-Kennedy, and Jobe's<br>MRI; stage 1 or 2 SIS                                                                                            |
| 45 | Bateman & Adams (2014)  | 4 | N = 11. 6 males, 5 females. Divided into 3 groups                                                 | <b>Rotator cuff tendinopathy</b> , defined by:<br><br>Sufficient investigations that included clinical assessment<br>X-ray and either diagnostic ultrasound or Magnetic Resonance Imaging to establish the diagnosis of rotator cuff tendinopathy         |
| 46 | Beaudreuil et al (2011) | 9 | N = 70. Age greater than 30 and duration > 1 month. Age range 34 - 79                             | <b>Impingement syndrome</b> , defined by: <b>Impingement syndrome</b> , defined by: <b>Impingement syndrome</b><br>Shoulder pain                                                                                                                          |



|    |                      |   |                                                                                                                                          |                                                                                                                                                                                                                                                                                                                                                                                     |
|----|----------------------|---|------------------------------------------------------------------------------------------------------------------------------------------|-------------------------------------------------------------------------------------------------------------------------------------------------------------------------------------------------------------------------------------------------------------------------------------------------------------------------------------------------------------------------------------|
|    |                      |   | duration of symptoms = 42.7 months                                                                                                       | One +ve Neer, Hawkins-Kennedy, Jobe's test or pain with resisted external rotation/abduction, and painful arc<br>No imaging reported                                                                                                                                                                                                                                                |
| 52 | Cheng & Hung (2007)  | 5 | N=103; mean age= 32 years; proportion male= 72/103 (70%) Mean duration of symptoms = not reported (>90 days following injury was stated) | <b>Work-related rotator cuff disorder, defined by:</b> Work-related rotator cuff disorder, Medical diagnosis with signs & symptoms of cuff disorder ( criteria not specified)<br>Severe tears that were requiring surgical intervention were excluded by no mention of how this was decided<br>No imaging reported                                                                  |
| 53 | Cift et al. (2015)   | 5 | N=40; mean age= 46 years. Proportion male= 18/40 (45%). Mean duration of symptoms not reported                                           | <b>Subacromial syndrome</b> , defined by: <b>Subacromial</b><br>Clinical sign of impingement: painful arc, Hawkins and/or Neers positive, MRI<br>Excluded shoulder surg; full thickness cuff tear; hemiplegia; Fracture; ad.cap (restrict movement); prev injections within last 3 months; recent shoulder trauma<br>MRI confirmed rotator cuff tendinitis or sub-acromial bursitis |
| 54 | Citaker et al (2005) | 3 | N = 40; mean age = 54.2 years; proportion male = not reported; mean duration of symptoms = not reported                                  | <b>Shoulder impingement syndrome</b> , defined by: <b>Shoulder impingement syndrome</b> , defined by: <b>Shoulder impingement syndrome</b> , defined by: No detail regarding symptomatic presentation reported<br>Patients with clinical and radiological evidence of impingement but no further<br>No imaging reported                                                             |
| 55 | Cloke et al (2008)   | 5 | N=112; mean age=55 years Proportion male= unknown Mean duration of symptoms not reported (< 6 month duration was stated)                 | Painful arc of the shoulder, defined by: Painful arc of the shoulder, defined by: Painful arc of the shoulder<br>Painful arc 60-120 deg abduction; pain in area of deltoid insertion and lateral; ?Neers and Hawkins Kennedy.                                                                                                                                                       |



|    |                        |   |                                                                                                        |                                                                                                                                                                                                                                                                                                                                                                                                                                                                                                |
|----|------------------------|---|--------------------------------------------------------------------------------------------------------|------------------------------------------------------------------------------------------------------------------------------------------------------------------------------------------------------------------------------------------------------------------------------------------------------------------------------------------------------------------------------------------------------------------------------------------------------------------------------------------------|
|    |                        |   |                                                                                                        | Two +ve Neer, Hawkins-Kennedy or Jobe's<br>No imaging reported                                                                                                                                                                                                                                                                                                                                                                                                                                 |
| 60 | Deveraeux et al (2016) | 5 | N = 100; mean age = 48 years; proportion male = 61/100 (61%); mean duration of symptoms = not reported | Subacromial impingement syndrome, defined by: Subacromial impingement syndrome, defined by Subacromial impingement syndrome, defined by Anterolateral shoulder pain<br>+ ve Hawkins-Kennedy test, Painful arc<br>Imaging consistent with impingement; no further detail reported                                                                                                                                                                                                               |
| 61 | Dickens et al (2005)   | 8 | N=85; mean age=55; proportion male= 48 (56%). Mean duration of symptoms=                               | <b>Subacromial impingement syndrome</b> , defined by: <b>Subacromial impingement syndrome</b> , defined by Subacromial impingement syndrome, defined by Diagnosed by shoulder specialist surgeon based on clinical examination and history along with radiographic findings and diagnostic injections of anaesthetic.<br><br>Exclusion included adhesive capsulitis or a clinically obvious rotator cuff tear, grade III sub-acromial spur (on x-ray)<br>Plain film X-rays on all participants |
| 62 | Dilek et al (2016)     | 8 | N = 61; mean age = 49 years; proportion male = 19/61 (31%); mean duration of symptoms = 17 months      | <b>Subacromial impingement syndrome</b> , defined by: <b>Subacromial impingement syndrome</b> , defined by Subacromial impingement syndrome, defined by No symptom details reported<br>+ve Neer or Hawkins-Kennedy test<br>MRI diagnosis of SIS but no detail reported                                                                                                                                                                                                                         |
| 63 | Dogan et al (2010)     | 9 | N = 52; mean age = 53.6 years; proportion male = 19/52 (37%); mean duration of symptoms = 13.5 months  | <b>Subacromial impingement syndrome</b> , defined by: <b>Subacromial impingement syndrome</b> , defined by Subacromial impingement syndrome, defined by No symptom details reported<br><br>No detail reported beyond 'detailed physical examination'<br>MRI to exclude rotator cuff tear                                                                                                                                                                                                       |
| 64 | Dogu et al (2012)      | 7 | N = 46; mean age = 56 years; proportion male = 15/46 (33%); mean                                       | <b>Subacromial impingement syndrome</b> , defined by: <b>Subacromial impingement syndrome</b> , defined by Subacromial impingement syndrome, defined by                                                                                                                                                                                                                                                                                                                                        |



|    |                          |    |                                                                                                                     |                                                                                                                                                                                                                                                                                           |
|----|--------------------------|----|---------------------------------------------------------------------------------------------------------------------|-------------------------------------------------------------------------------------------------------------------------------------------------------------------------------------------------------------------------------------------------------------------------------------------|
|    |                          |    | duration of symptoms = 8.5 months                                                                                   | Shoulder pain<br>+ve Neer, Hawkins-Kennedy or Jobe's test<br>MRI with +ve microstructural changes in the rotator cuff indicated or identification of acromial spur indicative of SIS                                                                                                      |
| 65 | Ekeberg et al (2009)     | 10 | N = 106; mean age = 50.5 years; proportion male = 41/106 (39%); mean duration of symptoms = unclear                 | <b>Rotator cuff disease, defined by:</b> Rotator<br>Shoulder pain<br>Pain on abduction, largely maintained range of movement, +ve Hawkins-Kennedy test<br>Patients with radiological findings indicating glenohumeral joint pathology were excluded but no further detail reported        |
| 66 | Ellegaard et al (2016)   | 7  | N=99; mean age=49; proportion male= 42 (41%). Mean duration of symptoms= not reported (symptoms for more than 4/52) | <b>Subacromial pain syndrome, defined by:</b><br>US diagnosed impingement<br>Exclusion included complete or partial rupture of sh muscles on US scan, capsular pattern of restriction, contraindications to interventions used in trial, previous shoulder<br>US diagnosed enlarged bursa |
| 66 | Engebretsen et al (2009) | 7  | N = 104; mean age = 48 years; proportion male = 52 (50%); mean duration of symptoms = unclear                       | <b>Subacromial pain syndrome, defined by:</b><br>Shoulder pain<br>Pain on abduction, normal passive range of movement, pain with isometric testing, +ve Hawkins-Kennedy test<br>No imaging reported                                                                                       |
| 67 | Esmalian et al (2012)    | 7  | N = 50; mean age = 50.2 years; proportion male = 24 (48%); mean duration of symptoms = not reported                 | <b>Rotator cuff tendinitis, defined by:</b> Rotator<br>Shoulder pain<br>Pain from two out of five tests: Painful arc, 'impingement' test, Hawkins-Kennedy test, palpation, 'supraspinatus' test<br>No imaging reported                                                                    |

|    |                                                                                                  |   |                                                                                                    |                                                                                                                                                                                                         |
|----|--------------------------------------------------------------------------------------------------|---|----------------------------------------------------------------------------------------------------|---------------------------------------------------------------------------------------------------------------------------------------------------------------------------------------------------------|
| 68 | <b>Eyigor et al (2010a)</b><br><b>*NOTE*</b><br><b>incorrectly listed as Kormaz et al (2010)</b> | 6 | N = 40; mean age = 59.2 years; proportion male = 11 (28%); mean duration of symptoms = 8.8 months  | <b>Rotator cuff tendinitis</b> , defined by:<br>Shoulder pain<br>No detail reported in relation to physical examination<br>Rotator cuff pathology detected on USS but no further detail reported        |
| 69 | <b>Galace de Freitas et al (2014)</b>                                                            | 9 | N = 56; mean age = 50.5 years; proportion male = 20 (36%); mean duration of symptoms = 21.6 months | <b>Subacromial impingement syndrome</b> , defined by:<br>Shoulder pain<br>Maintained range of movement and +ve Neer's test<br>SIS identified by USS or MRI according to Neer's criteria (stage I or II) |
| 70 | <b>Galasso et al (2012)</b>                                                                      | 7 | N = 20; mean age = 50.9 years; proportion male = 11 (55%); mean duration of symptoms = 53.3 months | <b>Supraspinatus tendinopathy</b> , defined by:<br>Shoulder pain<br>+ve Full can or Jobe's test<br>MRI demonstrating intact tendon and diffuse mildly increased signal intensity                        |
| 71 | <b>Garcia et al (2016)</b>                                                                       | 7 | N = 88; mean age = 52.2 years; proportion male = 31 (35%); mean duration of symptoms = unclear     | Impingement syndrome, defined by:<br>Shoulder pain<br>+ve Neer, Hawkins-Kennedy test, painful arc, pain on palpation, pain with isometric<br>Calcification excluded by x-ray                            |
| 72 | <b>Garrido et al (2016)</b>                                                                      | 5 | N = 68. Mean age 33.4 years. Divided in to 2 different groups                                      | <b>Impingement syndrome</b> , defined by: <b>Impingement syndrome</b> , defined by:<br>Compatible clinical symptoms of more than 3 months progression<br>Unilateral injury<br>No imaging reported       |
| 73 | <b>Giombini et al (2006)</b>                                                                     | 7 | N = 37; mean age = 26.7 years; proportion male = 29 (78%); mean duration of symptoms = unclear     | <b>Supraspinatus tendinopathy</b> , defined by:<br>Shoulder pain                                                                                                                                        |

|    |                              |   |                                                                                                                   |                                                                                                                                                                                                                                                                                                                                                                                                                                                                                                                                             |
|----|------------------------------|---|-------------------------------------------------------------------------------------------------------------------|---------------------------------------------------------------------------------------------------------------------------------------------------------------------------------------------------------------------------------------------------------------------------------------------------------------------------------------------------------------------------------------------------------------------------------------------------------------------------------------------------------------------------------------------|
|    |                              |   | duration of symptoms = unclear                                                                                    | +ve Hawkins-Kennedy and Empty-can test<br>USS demonstrating intact tendon and non-homogeneous increased signal intensity                                                                                                                                                                                                                                                                                                                                                                                                                    |
| 74 | Granviken & Vasseljen (2015) | 8 | N = 46; mean age = 47.9 years; proportion male = 24 (52%); mean duration of symptoms = 14.5 months                | <b>Subacromial impingement</b> , defined by:<br>Shoulder pain<br>+ve Hawkins-Kennedy test. Painful arc and pain with resisted external rotation<br>Patients with labrum pathology on imaging were excluded but no further detail reported                                                                                                                                                                                                                                                                                                   |
| 79 | Haik et al (2014)            | 4 | N=50; mean age= not reported approx. 32; proportion male= 32 (64%). Mean duration of symptoms= 45 months          | <b>Shoulder impingement</b> , defined by:<br><b>Shoulder</b><br>Diagnosis included at least 3 of the following: Neers, Hawkins, Jobe, pain on passive or isometric lateral rotation, pain on active shoulder elevation, pain with palpation of rotator cuff, pain in the C5 or C6<br>Excluded if had fracture, osteoporosis, malignancy, infection, active inflammatory process, pregnant, systemic illness, signs of complete rotator cuff tear or acute inflammation, GH instability, previous fracture or surgery<br>No imaging reported |
| 83 | Holmgren et al (2012)        | 8 | N=102; mean age= 52; proportion male= 66 (65%). Mean duration of symptoms not stated (symptoms for more than 12). | <b>Subacromial impingement syndrome</b> , defined by:<br><b>Subacromial impingement syndrome</b> , defined by:<br>Diagnosis based on 3 of the 5 tests being positive: Hawkins, Neer, Jobe's, Patte's manoeuvre. Positive response to steroid injection<br>Excluded if had malignancy, OA Gh, os acromiale, AC OA, prev #s of shoulder, prev surgery shoulder, polyarthritis, RA, fibromyalgia, instability, frozen shoulder,                                                                                                                |

|    |                        |   |                                                                                                                        |                                                                                                                                                                                                                                                                                                                                                                                                                                        |
|----|------------------------|---|------------------------------------------------------------------------------------------------------------------------|----------------------------------------------------------------------------------------------------------------------------------------------------------------------------------------------------------------------------------------------------------------------------------------------------------------------------------------------------------------------------------------------------------------------------------------|
|    |                        |   |                                                                                                                        | ?XR- unclear                                                                                                                                                                                                                                                                                                                                                                                                                           |
| 86 | Hoyek et al (2014)     | 4 | N = 16; mean age = 46.3 years; proportion male = 8/16 (50%); mean duration of symptoms = not reported                  | Shoulder impingement syndrome, defined by:<br><br>Stage II shoulder impingement classified following an examination<br>Clinical testing not detailed<br>No imaging reported                                                                                                                                                                                                                                                            |
| 91 | Johansson et al (2005) | 8 | N=85; mean age= 49; proportion male= 26/85 (31%). Mean duration of symptoms= not reported (all had symptoms for >2/12) | <b>Impingement syndrome</b> , defined by:<br><br>Positive Hawkins-kennedy sign, Jobe supraspinatus test, Neers sign and painful arc in abduction 60-120<br><br>Radiology imaging. Excluded radiology findings of malignancy, GH OA, bony spurs and osteophytes decreasing SA space, polyarthritis, fibromyalgia, prev fractures, instability, frozen shoulder, ruptured rotator cuff (pronounced weakness and atrophy), acute bursitis |
| 92 | Johansson et al (2011) | 7 | N = 91; mean age = 50.5 years; proportion male = 39 (43%); mean duration of symptoms unclear                           | <b>Subacromial impingement</b> , defined by:<br><br>Shoulder pain<br>+ve Hawkins-Kennedy, Jobe and Neer Impingement tests with painful arc during active abduction.<br><br>No imaging reported                                                                                                                                                                                                                                         |
| 94 | Kachingwe et al (2008) | 5 | 5/10 N = 33. Males = 17, Female = 16. Age range = 18 – 74. Mean 46.4 years. Divided in to 4 groups                     | <b>Shoulder impingement</b> , defined by:<br><br>Superiolateral shoulder pain                                                                                                                                                                                                                                                                                                                                                          |

years. Divided into 4 groups

Two out of four specified objective signs and symptoms: a positive (painful) Neer impingement test, a positive (painful) Hawkins-Kennedy impingement test, painful limitation of active shoulder elevation (flexion, abduction, scaption), and pain or limitation with the functional movement patterns of hand-behind-back or hand-behind-head

|     |                                    |   |                                                                                                |                                                                                                                                                                                                                                                                                                                                                                                                                                                                          |
|-----|------------------------------------|---|------------------------------------------------------------------------------------------------|--------------------------------------------------------------------------------------------------------------------------------------------------------------------------------------------------------------------------------------------------------------------------------------------------------------------------------------------------------------------------------------------------------------------------------------------------------------------------|
| 95  | Kardouni et al (2015) <i>JOSPT</i> | 7 | N = 52; mean age = 32 years; proportion male = 28 (54%); mean duration of symptoms = 38 months | <p><b>Subacromial impingement</b>, defined by:</p> <p>Shoulder pain</p> <p>Pain from three out of five tests: Painful arc, Hawkins-Kennedy test Neer Impingement test, Jobe's test, resisted external rotation</p> <p>No imaging reported</p>                                                                                                                                                                                                                            |
| 100 | Kaya et al (2014)                  | 7 | 60 participants between 30 and 60 years old, divided into 2 groups of n = 30.                  | <p>Shoulder impingement syndrome, defined by:</p> <p>Not specified</p> <p>SIS Assessment form including pain severity, shoulder range of motion, shoulder muscle strength, Neer painful arc, Hawkins-Kennedy, sulcus sign, and apprehension tests for instability. The combination of the Hawkins-Kennedy impingement sign, the painful arc sign, and the infraspinatus muscle test was used to diagnose</p> <p>- ve for massive rotator cuff or labral tears on MRI</p> |
| 102 | Kelle & Kozanoglu (2014)           | 4 | N = 135. Male 30 / Female 105. Age range 18 - 77 years. Divided into 3 groups.                 | Subacromial impingement syndrome, defined by:                                                                                                                                                                                                                                                                                                                                                                                                                            |

|     |                     |   |                                                                                         |                                                                                                                                                                                                                                                                                                                                                                                                                                                                                            |
|-----|---------------------|---|-----------------------------------------------------------------------------------------|--------------------------------------------------------------------------------------------------------------------------------------------------------------------------------------------------------------------------------------------------------------------------------------------------------------------------------------------------------------------------------------------------------------------------------------------------------------------------------------------|
|     |                     |   |                                                                                         | Neer, Hawkins-Kennedy and Empty Can tests +ve,<br>+ve MRI findings for stage I or II subacromial impingement syndrome                                                                                                                                                                                                                                                                                                                                                                      |
| 103 | Kolk et al (2013)   | 7 | N = 82. Male 25 / Female 57. Mean age 47 years. Divided in to 2 different groups        | <b>Chronic Rotator Cuff tendinitis</b> , defined by:<br>Symptoms longer than 6/12<br>+ve painful arc and a positive empty can test<br>XR and USS to exclude other pathologies                                                                                                                                                                                                                                                                                                              |
| 106 | Kromer et al (2013) | 7 | N=90; mean age=52 years. Proportion male= 44 (49%) Mean duration of symptoms = 34 weeks | <b>Shoulder impingement</b> , defined by:<br>Complaints in the GH region or proximal arm; presence of at least one of the following: Neers; Hawkins; painful arc; pain on resistance test of the cuff<br><br>Excluded high pain (>8/10); scap-thoracic dysfunction; shoulder instab; ad.cap; more than one third movement restriction; substantial shoulder weakness or loss of function; neuro involvement; diabetes; psychotherapeutic drugs; compensation claims<br>No imaging reported |
| 107 | Kromer et al (2010) | 7 | N = 90. Age range 18 - 75 years. Divided in to 2 different groups                       | <b>Shoulder impingement syndrome</b> , defined by:<br><br>presence of one of the following signs: Neer impingement test, Hawkins-Kennedy impingement test, painful arc with active abduction or flexion, and pain with one of the following resistance tests: external rotation, internal rotation, abduction, or flexion.<br><br>No imaging reported                                                                                                                                      |
| 108 | Kumar et al (2012)  | 4 | N = 52. Male 36 / Female 16. Mean age 36.2 years. Divided in to 2                       | <b>Subacromial impingement syndrome, defined by:</b>                                                                                                                                                                                                                                                                                                                                                                                                                                       |

different groups

uni- lateral shoulder pain of more than 1 week localized (anterior and/or anterolateral) to the acromion and pain produced or increased during flexion and/or abduction of the symptomatic shoulder and at least any four of the following: Positive Neer impingement sign, Positive Hawkins sign, Pain reproduced during supraspinatus empty can test, Painful arc of movement between 60° to 120°, Pain with palpation on the greater tuberosity of the humerus.

In some cases, radiological investigation and CT scan was supplemented

|     |                             |   |                                                                                                     |                                                                                                                                                                                                                                                                                        |
|-----|-----------------------------|---|-----------------------------------------------------------------------------------------------------|----------------------------------------------------------------------------------------------------------------------------------------------------------------------------------------------------------------------------------------------------------------------------------------|
| 109 | Kurtais Gursel et al (2004) | 6 | N = 38. Male 12 / Female 26. Age range 35 – 69 years. Divided in to 2 different groups              | <p><b>Soft tissue disorder of the shoulder</b>, defined by:</p> <p>Shoulder pain and limitation of movement for at least 4 weeks</p> <p>Diagnosed by USS or MRI</p>                                                                                                                    |
| 110 | Lewis et al (2005)          | 5 | N = 60; mean age = 48.9 years; proportion male = 35/60 (58%); mean duration of symptoms = 14 months | <p>Subacromial impingement syndrome, defined by: Subacromial impingement syndrome, defined by:</p> <p>Unilateral shoulder pain</p> <p>Pain with flexion and/ or abduction, + ve Neer, Hawkins-Kennedy, empty can test, painful arc, pain with palpation</p> <p>No imaging reported</p> |
| 111 | Littlewood et al (2015)     | 6 | N = 86. Age range 23 – 83 years. Divided in to 2 groups                                             | <p><b>Rotator cuff tendinopathy</b>, defined by: <b>Rotator cuff</b></p> <p>Shoulder pain</p>                                                                                                                                                                                          |

|     |                          |   |                                                                                                          |                                                                                                                                                                                                                                                                                                                                                |
|-----|--------------------------|---|----------------------------------------------------------------------------------------------------------|------------------------------------------------------------------------------------------------------------------------------------------------------------------------------------------------------------------------------------------------------------------------------------------------------------------------------------------------|
|     |                          |   |                                                                                                          | Primary complaint of shoulder pain, no / minimal resting pain, range of shoulder movement largely preserved, shoulder pain provoked with resisted muscle tests, usually abduction or lateral rotation                                                                                                                                          |
|     |                          |   |                                                                                                          | No imaging reported                                                                                                                                                                                                                                                                                                                            |
| 112 | Littlewood et al (2014)  | 6 | N = 24. Male : female 50:50. Age range = 44 – 79 years. Divided in to 2 groups                           | <b>Rotator cuff tendinopathy</b> , defined by: <b>Rotator cuff tendinopathy</b> , defined by:<br>Shoulder pain<br>Primary complaint of shoulder pain, no / minimal resting pain, range of shoulder movement largely preserved, shoulder pain provoked with resisted muscle tests, usually abduction or lateral rotation<br>No imaging reported |
| 113 | Lombardi et al (2008)    | 8 | N = 60. Divided in to 2 groups                                                                           | <b>Shoulder Impingement Syndrome</b> , defined by:<br><b>Shoulder Impingement Syndrome</b> , defined by:<br>Painful arc<br>+ve Neer test and Hawkin test<br>No imaging reported                                                                                                                                                                |
| 114 | Ludewig & Borstad (2003) | 6 | N = 67; mean age = 49 years; proportion male = 67 (100%); mean duration of symptoms = not reported       | <b>Impingement syndrome</b> , defined by:<br>Shoulder pain<br>Pain from two out of five impingement tests: Hawkins-Kennedy, Neer, Jobe, Yocum and/ or Speed's test, and pain reproduction from two out three further tests: painful arc, tenderness to palpation, resisted muscle testing<br>No imaging reported                               |
| 115 | Maenhout (2013)          | 6 | Sixty-one patients, divided into 2 groups (n = 30, mean age = 39.4 +/- 13.1 years and n = 31, mean age = | <b>Subacromial syndrome</b> , defined by:<br>Unilateral anterolateral shoulder pain                                                                                                                                                                                                                                                            |



|     |                                      |   |                                                                                                     |                                                                                                                                                                                                                                                                                                                                                                                                                       |
|-----|--------------------------------------|---|-----------------------------------------------------------------------------------------------------|-----------------------------------------------------------------------------------------------------------------------------------------------------------------------------------------------------------------------------------------------------------------------------------------------------------------------------------------------------------------------------------------------------------------------|
|     |                                      |   | 10.1 years and n = 31, mean age = 40.2 +/- 12.9 years                                               | <p>Painful arc, 2 out of 3 impingement tests +ve (Hawkins, Jobe and/or Neer), 2 out of 4 resistance tests painful (full can (thumb up) abduction at 90 degrees, resisted abduction at 0 degrees, resisted external or internal rotation with the arm adducted) and pain with palpation of the supraspinatus and/or infraspinatus tendon insertion</p> <p>- ve for partial or full rotator cuff tears on MRI or US</p> |
| 117 | <b>Martins &amp; Marziale (2012)</b> | 6 | N = 16; mean age = unclear; proportion male = 2 (12.5%); mean duration of symptoms = unclear        | <p><b>Rotator cuff disorder</b>, defined by:</p> <p>Medical diagnosis of rotator cuff disorder but no further detail reported</p>                                                                                                                                                                                                                                                                                     |
| 118 | <b>Marzetti et al (2014)</b>         | 7 | N = 48; mean age = 62.1 years; proportion male = 21 (44%); mean duration of symptoms = not reported | <p>No imaging reported</p> <p><b>Shoulder impingement syndrome</b>, defined by:</p> <p>Shoulder pain</p> <p>+ve Hawkins-Kennedy and Neer</p> <p>Impingement tests with pain also during resisted muscle testing</p> <p>Use of MRI and radiographs to diagnose SIS according to Neer's criteria (stage I)</p>                                                                                                          |
| 12  | <b>McClatchie et al (2009)</b>       | 6 | Twenty-one subjects (14 females, 7 males) with an average age of 49.8 (+/- 9.8) years               | <p><b>Shoulder pain, defined by:</b></p> <p>Unilateral shoulder pain of at least 6/52</p> <p>Painful arc with shoulder abduction</p> <p>Xray to exclude OA</p>                                                                                                                                                                                                                                                        |
| 9   | <b>Michener et al (2015)</b>         | 9 | N = 56. Average age = 31.7. Divided in to 2 groups.                                                 | <p><b>Subacromial impingement syndrome, defined by:</b></p>                                                                                                                                                                                                                                                                                                                                                           |

|     |                                                     |   |                                                                                                       |                                                                                                                                                                                                                                                                                                                                                                                                     |
|-----|-----------------------------------------------------|---|-------------------------------------------------------------------------------------------------------|-----------------------------------------------------------------------------------------------------------------------------------------------------------------------------------------------------------------------------------------------------------------------------------------------------------------------------------------------------------------------------------------------------|
|     |                                                     |   |                                                                                                       | positive on 3 of 5 tests of the clinical examination for subacromial impingement syndrome: 1) Hawkins test, 2) Neer test, 3) pain arc test, 4) Jobe/Empty Can test - pain or weakness, 5) resisted shoulder external rotation test - pain or weakness                                                                                                                                               |
|     |                                                     |   |                                                                                                       | No imaging reported                                                                                                                                                                                                                                                                                                                                                                                 |
| 120 | <b>Miller and Osmotherly (2009)</b>                 | 6 | N = 22. Age range = 45 – 67. Divided in to 2 groups.                                                  | <p><b>Shoulder impingement syndrome</b>, defined by:</p> <p>Unilateral shoulder pain</p> <p>Each participant's pain was reproduced using the shoulder impingement test described by Hawkins and Kennedy</p> <p>No imaging reported</p>                                                                                                                                                              |
| 123 | <b>Moezy et al (2014)</b>                           | 6 | N = 68. Mean Age = 48. Divided in to 2 groups.                                                        | <p><b>Shoulder impingement syndrome</b>, defined by:</p> <p>Unilateral shoulder pain</p> <p>Tenderness to palpation of the rotator cuff tendons; - Positive impingement tests, which included the Hawkins, Neer, and Empty can tests) or a painful arc of movement (60°–120°) Pain produced or increased during flexion and/or abduction of the symptomatic shoulder</p> <p>No imaging reported</p> |
| 124 | Montes-Molina et al (2012)<br><i>Clinical Rehab</i> | 8 | N = 30; mean age = 59.1 years; proportion male = 8/30 (27%); mean duration of symptoms = not reported | <p>Shoulder tendinopathy, defined by:</p> <p>Unilateral shoulder pain</p> <p>Clinical testing not detailed</p> <p>Ultrasonography, MRI or x-ray used to identify rotator cuff tendinitis, calcific tendinitis, or partial rotator cuff tear</p>                                                                                                                                                     |

|     |                                                                               |   |                                                                                                       |                                                                                                                                                                                                                                                                                                                                                                                                                                                                                                                                           |
|-----|-------------------------------------------------------------------------------|---|-------------------------------------------------------------------------------------------------------|-------------------------------------------------------------------------------------------------------------------------------------------------------------------------------------------------------------------------------------------------------------------------------------------------------------------------------------------------------------------------------------------------------------------------------------------------------------------------------------------------------------------------------------------|
| 126 | Mulligan et al (2016)                                                         | 5 | N = 40. 26 women and 14 men, aged 30-74 (mean 51.1 years). Divided in to 2 groups.                    | <p><b>Subacromial impingement syndrome, defined by:</b></p> <ul style="list-style-type: none"> <li>- primary pain complaint in the shoulder and/or upper arm - presence of at least two of the following findings: painful arc, weakness in external rotation, positive impingement sign (Hawkins-Kennedy or Neer/Walsh tests), pain and/or weakness with resistance to internal rotation, external rotation, or scapular plane elevation.</li> </ul> <p>Radiological imaging and periodic MRI evaluation supplemented the diagnosis.</p> |
| 27  | Munday et al (2007)<br>*NOTE*<br>Incorrectly listed as Brantingham et al 2007 | 5 | N = 30; mean age = 22.5 years; proportion male = 16/30 (53%); mean duration of symptoms = 22.7 months | <p>Shoulder impingement syndrome, defined by:</p> <p>Shoulder pain</p> <p>Painful arc, +ve Neer, Hawkins-Kennedy test</p> <p>No imaging reported</p>                                                                                                                                                                                                                                                                                                                                                                                      |
| 131 | Osteras et al (2009)                                                          | 6 | N = 56; mean age = 44 years; proportion male = unclear; mean duration of symptoms = 40 months         | <p><b>Shoulder impingement syndrome, defined by:</b></p> <p>Shoulder pain</p> <p>+ve Hawkins-Kennedy test</p> <p>No imaging reported</p>                                                                                                                                                                                                                                                                                                                                                                                                  |
| 132 | Otadi et al (2012)                                                            | 8 | N = 42. All female. Mean age = 49 years. Divided in to 2 groups.                                      | <p><b>Shoulder tendonitis, defined by:</b></p> <p>Local pain in supraspinatus and /or long head of biceps tendons - painful arc in abduction movement, pain in isometric resistance and passive stretch in supraspinatus and biceps - tenderness over the involved tendons and positive speed's sign or impingement test</p>                                                                                                                                                                                                              |

|     |                                      |   |                                                                                                      |                                                                                                                                                                                                                                                                              |
|-----|--------------------------------------|---|------------------------------------------------------------------------------------------------------|------------------------------------------------------------------------------------------------------------------------------------------------------------------------------------------------------------------------------------------------------------------------------|
|     |                                      |   |                                                                                                      | MRIs and/or CT Scans were used as additional diagnostic tools.                                                                                                                                                                                                               |
| 134 | <b>Pekyavas &amp; Baltaci (2016)</b> | 6 | N = 70. Mean age 47.1 years. Divided in to 4 groups                                                  | Subacromial impingement syndrome, defined by:<br><br>Shoulder pain<br>Diagnosed with Subacromial Impingement Syndrome but no detail on what criteria<br>No imaging reported                                                                                                  |
| 135 | <b>Perez-Merino et al (2016)</b>     | 5 | N = 99. Mean age = 54 years. Male = 42, female 57. Divided in to 3 groups.                           | Subacromial impingement syndrome, defined by:<br><br>Shoulder pain<br>Diagnosed by ultrasound scanning with rotator cuff tendinitis or tendinosis, or partial tear of the rotator cuff and/or of the brachial plexus<br>Diagnosis confirmed by ultrasonography               |
| 137 | <b>Polimeni et al (2003)</b>         | 2 | N = 50; mean age = 56 years; proportion male = 14/50 (28%); mean duration of symptoms = not reported | Painful shoulder syndrome, defined by:<br>Shoulder pain<br>+ve Yocum, Jobe, 'Impingement', or Yergason test<br>Ultrasonography used to report normal cuff, tendonitis, or rupture. X-ray to identify presence of osteophytes and acromial                                    |
| 138 | <b>Rabini et al (2012)</b>           | 8 | N = 92. Males = 31, Females = 61. Divided in to 2 groups.                                            | <b>Rotator cuff tendinopathy</b> , defined by:<br><br>Clinical examination, including 3 isometric tests (abdn at 0 and 30 deg, IR and ER) and +ve Kennedy-Hawkins sign<br>X-ray of the affected shoulder in anteroposterior, axillary, and outlet views, confirmation by MRI |
| 139 | <b>Razavi, M &amp;</b>               | 4 | N = 33. Males = 21, Females = 12.                                                                    | <b>Rotator cuff tendinitis</b> , defined by:                                                                                                                                                                                                                                 |

|     |                               |   |                                                          |                                                                                                                                                                                                                                                                                                                                                                                                                                                                                                                                                   |
|-----|-------------------------------|---|----------------------------------------------------------|---------------------------------------------------------------------------------------------------------------------------------------------------------------------------------------------------------------------------------------------------------------------------------------------------------------------------------------------------------------------------------------------------------------------------------------------------------------------------------------------------------------------------------------------------|
|     | <b>Jansen, G (2004)</b>       |   | Age range = 27 – 77. Divided Into 2 groups.              | <p>Pain on palpation, isometric testing and passive stretching in at least one of the rotator cuff muscles.</p> <p>MRI or XR that indicated other painful conditions in the shoulder.</p>                                                                                                                                                                                                                                                                                                                                                         |
| 140 | <b>Rhon et al (2014)</b>      | 8 | 104 patients aged 18 to 65 years                         | <p><b>Shoulder impingement Syndrome</b>, defined by:<br/> <b>Shoulder impingement Syndrome</b>, defined by:</p> <p>Unilateral shoulder pain</p> <p>No detail reported in relation to physical examination</p> <p>No imaging reported</p>                                                                                                                                                                                                                                                                                                          |
| 144 | <b>Santamato et al (2009)</b> | 8 | N = 70. Males = 28, Females = 42. Mean age = 54.1 years. | <p>Subacromial impingement syndrome, defined by:<br/> Subacromial impingement syndrome, defined by:</p> <p>Presence of shoulder pain</p> <p>Pain on abduction of the shoulder with a painful arch, a positive impingement sign (Hawkins sign), and a positive impingement test (relief of pain within 15 minutes after the injection of a local anesthetic [bupivacaine, 5 mL]) into the subacromial space).</p> <p>Radiology included ultrasonography or magnetic resonance imaging of the shoulder to confirm the diagnosis of stage I or 1</p> |
| 143 | <b>Santamato et al (2016)</b> | 7 | N = 30. Males = 16, Females = 14. Mean age = 40.2 years. | <p>Subacromial impingement syndrome, defined by:<br/> Subacromial impingement syndrome, defined by:</p> <p>Presence of unilateral shoulder pain,</p>                                                                                                                                                                                                                                                                                                                                                                                              |

|     |                       |   |                                                                                                         |                                                                                                                                                                                                                                                                                                                                                               |
|-----|-----------------------|---|---------------------------------------------------------------------------------------------------------|---------------------------------------------------------------------------------------------------------------------------------------------------------------------------------------------------------------------------------------------------------------------------------------------------------------------------------------------------------------|
|     |                       |   |                                                                                                         | <p>Pain on abduction of the shoulder with painful arc, a positive impingement sign (Hawkins sign), and a positive impingement test (relief of pain within 15 minutes after injection of local anesthetic [bupivacaine 5 mL] into the subacromial space).</p> <p>Radiography included ultrasonography, or magnetic resonance imaging (MRI) of the shoulder</p> |
| 146 | Saunders (2003)       | 2 | N = 36, divided into 3 equal groups.                                                                    | <p><b>Supraspinatus tendinosis</b>, defined by:</p> <p>Not defined</p> <p>Empty can test, full PROM required for</p> <p>No imaging reported</p>                                                                                                                                                                                                               |
| 147 | Schmitt et al (2001)  | 8 | N = 40. Mean age = 52. Divided in to 2 groups                                                           | <p><b>Supraspinatus tendinopathy</b>, defined by:</p> <p>Clinical diagnosis of chronic tendinitis of supraspinatus. No further detail given to how this was achieved.</p> <p>No imaging reported</p>                                                                                                                                                          |
| 151 | Senbursa et al (2007) | 4 | N = 30; mean age = 48.8 years; proportion male = not reported; mean duration of symptoms = not reported | <p><b>Shoulder impingement syndrome, defined by:</b></p> <p>Shoulder pain</p> <p>+ve Neer test, marked loss of shoulder movement or painful shoulder movement (frozen shoulder excluded)</p> <p>MRI used but no further detail reported</p>                                                                                                                   |
| 150 | Senbursa et al (2011) | 5 | N = 77. Age range = 35 - 55 . Divided in to 3 groups.                                                   | <p><b>Supraspinatus tendinopathy +/- Subacromial Impingement Syndrome</b>, defined by:</p> <p>Clinical examination</p> <p>MRI</p>                                                                                                                                                                                                                             |

|     |                             |   |                                                                                                       |                                                                                                                                                                                                                                                                                                                                                                                                                                                                                                                                                                                                                                                                                                                                                                               |
|-----|-----------------------------|---|-------------------------------------------------------------------------------------------------------|-------------------------------------------------------------------------------------------------------------------------------------------------------------------------------------------------------------------------------------------------------------------------------------------------------------------------------------------------------------------------------------------------------------------------------------------------------------------------------------------------------------------------------------------------------------------------------------------------------------------------------------------------------------------------------------------------------------------------------------------------------------------------------|
| 152 | <b>Shakeri et al (2013)</b> | 6 | N = 30. Mean age = 46.6. Divided in to 2 groups.                                                      | <p><b>Subacromial impingement syndrome, defined by:</b></p> <p>Confirmed by positive on two or more shoulder impingement screening items, and tested positive on at least one of the specific subacromial impingement tests. The shoulder impingement screening items included: a history of proximal anterior or lateral shoulder pain that had continued for more than one week during the last six months prior to study; a painful arc sign during active shoulder elevation; tenderness to rotator cuff tendon palpation; pain with resisted isometric shoulder abduction; positive Jobe's test (empty can test). Specific subacromial impingement tests used in the present study included the Neer sign, the Hawkins sign, and the Yocum test. No imaging reported</p> |
| 153 | <b>Simsek et al (2013)</b>  | 5 | N = 38, Females 25, Males 13. Mean age 51. Age range 18 to 69 years. Divided in to 2 groups           | <p>Subacromial impingement syndrome, defined by:</p> <p>Shoulder pain<br/>+ve Neer and Hawkins tests<br/>X-ray, MRI</p>                                                                                                                                                                                                                                                                                                                                                                                                                                                                                                                                                                                                                                                       |
| 154 | <b>Speed et al (2002)</b>   | 5 | N = 74; mean age = 52.5 years; proportion male = 31/74 (42%); mean duration of symptoms = 23.3 months | <p>Rotator cuff tendonitis, defined by:</p> <p>Shoulder pain<br/>Painful arc, no muscle weakness<br/>No imaging reported</p>                                                                                                                                                                                                                                                                                                                                                                                                                                                                                                                                                                                                                                                  |
| 155 | <b>Struyf et al (2013)</b>  | 7 | N = 22. Divided in to 2 groups.                                                                       | <p><b>Shoulder impingement syndrome, defined by:</b></p>                                                                                                                                                                                                                                                                                                                                                                                                                                                                                                                                                                                                                                                                                                                      |

|     |                     |   |                                                                                     |                                                                                                                                                                                                                                                                                                                          |
|-----|---------------------|---|-------------------------------------------------------------------------------------|--------------------------------------------------------------------------------------------------------------------------------------------------------------------------------------------------------------------------------------------------------------------------------------------------------------------------|
|     |                     |   |                                                                                     | 2 out of 3 +ve Hawkins, Neer, and Jobe. -ve Apprehension test and -ve Full can test, -ve Speeds and O'Briens test for biceps<br>No imaging reported                                                                                                                                                                      |
| 156 | Subasi et al (2012) | 4 | N = 57 patients (70 shoulders).                                                     | <b>Shoulder impingement syndrome, defined by:</b><br><br>+ve tests such as Neer', Hawkins, painful arc, supraspinatus, drop-arm, Yergasons, Speeds test and 50% improvement following subacromial injection<br>XR and MRI used as required                                                                               |
| 157 | Subasi et al (2016) | 5 | N = 70. Female 47, Male 23. Divided in to 2 groups                                  | <b>Subacromial impingement syndrome, defined by:</b><br><br>- one or more positive results for specific tests such as Neer's, Hawkins, painful arc, supraspinatus and 0° abduction, or supraspinatus lesion revealed by radiological imaging were diagnosed as SIS. MRI and XR were utilised for exclusion and inclusion |
| 165 | Thelen et al (2008) | 9 | N = 42, divided into 2 equal groups. Age range = 18 -24 years.                      | <b>Shoulder pain</b> , as defined by:<br><del>Shoulder pain</del><br>Shoulder pain<br>pain onset prior to 150° of active shoulder elevation in any plane, positive empty can test, positive Hawkins-Kennedy test<br>No imaging reported                                                                                  |
| 169 | Vas et al (2008)    | 8 | N = 425, divided into 2 groups of N = 205 and N = 220. 307 females, mean age = 55.7 | <b>Subacromial syndrome</b> , defined by:<br><del>Subacromial syndrome as defined by:</del><br>Not specified<br>Not specified                                                                                                                                                                                            |



|     |                                                                                  |   |                                                                                                                                           |                                                                                                                                                                                                                                                                                                                                                              |
|-----|----------------------------------------------------------------------------------|---|-------------------------------------------------------------------------------------------------------------------------------------------|--------------------------------------------------------------------------------------------------------------------------------------------------------------------------------------------------------------------------------------------------------------------------------------------------------------------------------------------------------------|
|     |                                                                                  |   |                                                                                                                                           | X-ray to exclude other pathologies                                                                                                                                                                                                                                                                                                                           |
| 170 | Walther et al (2004) –<br>*NOTE*<br>incorrectly<br>listed as<br>Gohlke<br>(2004) | 3 | N = 60; mean age = 50.7 years;<br>proportion male = 34 (56%); mean<br>duration of symptoms = 27.3 months                                  | Subacromial impingement syndrome, defined<br>by: Subacromial impingement syndrome, defined by:<br>Shoulder pain<br>+ve Neer test<br>Use of USS and radiographs to diagnose<br>SIS according to Neer's criteria (stage I or II)                                                                                                                               |
| 173 | Yavuz et al<br>(2014)                                                            | 7 | Thirty one patients (17 males, 14<br>females) with a mean age of 44.45 ±<br>12.25 years. Subjects divided into 2<br>groups (n =16 and 15) | <b>Shoulder impingement syndrome,<br/>defined by:</b> Shoulder impingement syndrome,<br>Unilateral shoulder pain with abduction<br>painful arc and presence of +ve<br>impingement signs (Hawkins and Neer tests)<br>with + ve impingement test (subacromial<br>injection of anesthetic)<br>MRI consistent with impingement but - ve for<br>rotator cuff tear |
| 174 | Yeldan et al<br>(2009)                                                           | 7 | N = 60. 13 males, 47 females. Divided<br>into 2 groups                                                                                    | <b>Subacromial impingement syndrome,<br/>defined by:</b><br><br>Demonstrate at least 3 of the following: (1) a<br>positive Neer test, (2) a positive Hawkin's<br>test, (3) pain with active shoulder elevation,<br>(4) pain with isometric resisted abduction<br>No imaging reported                                                                         |
| 175 | Yiasemides<br>et al (2011)                                                       | 8 | N = 98, divided into 2 groups of N =<br>51 and N =47. 51 females                                                                          | <b>Shoulder pain</b> , as defined by:<br>Shoulder pain<br>Painful active flexion or abduction. Pain, tenderness,<br>or restriction during passive<br>accessory movements at the glenohumeral,<br>acromioclavicular, or sternoclavicular<br>joint or during passive scapular movements                                                                        |

|     |                                                                                                                                                                                                                                                                |         |                                                       |
|-----|----------------------------------------------------------------------------------------------------------------------------------------------------------------------------------------------------------------------------------------------------------------|---------|-------------------------------------------------------|
| 176 | No imaging reported                                                                                                                                                                                                                                            |         |                                                       |
|     | Yildirim et al (2013)                                                                                                                                                                                                                                          | 4       | N = 100. Average age = 54.99. Divided in to 2 groups. |
|     | <b>Subacromial impingement syndrome, defined by:</b><br><br>Clinical diagnostic tests, including the Neer, Hawkins, painful arc, drop arm, Yergeson, Jobe and supraspinatus tests, were<br>MRI and XR was performed to both include and exclude from the study |         |                                                       |
|     | Mean                                                                                                                                                                                                                                                           | 6.22    |                                                       |
|     | SD                                                                                                                                                                                                                                                             | 1.68    |                                                       |
|     | Median                                                                                                                                                                                                                                                         | 6       |                                                       |
|     | Range                                                                                                                                                                                                                                                          | 2 to 10 |                                                       |

| Method of excluding cervical spine involvement | Category of cervical spine exclusion | Reviewer |
|------------------------------------------------|--------------------------------------|----------|
|------------------------------------------------|--------------------------------------|----------|

|                    |                                                         |              |
|--------------------|---------------------------------------------------------|--------------|
| No detail reported | <b>1. No method of exclusion undertaken or reported</b> | <b>Chris</b> |
|--------------------|---------------------------------------------------------|--------------|

|                                                          |                                                                  |            |
|----------------------------------------------------------|------------------------------------------------------------------|------------|
| Presence of cervical pain but no further detail reported | <b>2. Localized cervical spine symptoms and/or radiculopathy</b> | <b>Tom</b> |
|----------------------------------------------------------|------------------------------------------------------------------|------------|

|                                                        |                                              |            |
|--------------------------------------------------------|----------------------------------------------|------------|
| Examination of cervical spine; no further detail given | <b>3a. Cervical examination; unspecified</b> | <b>Tom</b> |
|--------------------------------------------------------|----------------------------------------------|------------|

|                                                                                    |                                                                  |            |
|------------------------------------------------------------------------------------|------------------------------------------------------------------|------------|
| Signs and symptoms suggestive of cervical disorders but no further detail reported | <b>2. Localized cervical spine symptoms and/or radiculopathy</b> | <b>Tom</b> |
|------------------------------------------------------------------------------------|------------------------------------------------------------------|------------|

|                    |                                                         |            |
|--------------------|---------------------------------------------------------|------------|
| No detail reported | <b>1. No method of exclusion undertaken or reported</b> | <b>Tom</b> |
|--------------------|---------------------------------------------------------|------------|

|                                                                                    |                                                                  |            |
|------------------------------------------------------------------------------------|------------------------------------------------------------------|------------|
| Signs and symptoms suggestive of cervical disorders but no further detail reported | <b>2. Localized cervical spine symptoms and/or radiculopathy</b> | <b>Tom</b> |
|------------------------------------------------------------------------------------|------------------------------------------------------------------|------------|

|                                                                                        |                                                                  |             |
|----------------------------------------------------------------------------------------|------------------------------------------------------------------|-------------|
| Signs and symptoms suggestive of cervical radiculopathy but no further detail reported | <b>2. Localized cervical spine symptoms and/or radiculopathy</b> | <b>Greg</b> |
|----------------------------------------------------------------------------------------|------------------------------------------------------------------|-------------|

|                                                                                        |                                                                  |            |
|----------------------------------------------------------------------------------------|------------------------------------------------------------------|------------|
| Signs and symptoms suggestive of cervical radiculopathy but no further detail reported | <b>2. Localized cervical spine symptoms and/or radiculopathy</b> | <b>Tom</b> |
|----------------------------------------------------------------------------------------|------------------------------------------------------------------|------------|

Positive Spurling test,  
dermatomal light touch  
deficits.

**6. Combined approach (3c, 4) Tom**

Cervicobrachialgia or  
shoulder pain during  
neck movement

**6. Combined approach (2, 3b) Tom**

No detail reported

**1. No method of exclusion  
undertaken or reported Tom**

History of ... Cervical  
radiculitis or  
radiculopathy..’ The  
physical exam consisted  
of active, passive, and  
accessory motion testing  
of the shoulder, shoulder  
girdle, and cervical and  
thoracic spine

**6. Combined approach (2, 3b, 4) Greg**

thoracic spine

|                    |                                                         |             |
|--------------------|---------------------------------------------------------|-------------|
| No detail reported | <b>1. No method of exclusion undertaken or reported</b> | <b>Greg</b> |
|--------------------|---------------------------------------------------------|-------------|

|                                                                 |                                                                  |             |
|-----------------------------------------------------------------|------------------------------------------------------------------|-------------|
| Exclusion criteria ‘... disc pathologies...’. No further detail | <b>2. Localized cervical spine symptoms and/or radiculopathy</b> | <b>Greg</b> |
|-----------------------------------------------------------------|------------------------------------------------------------------|-------------|

|                                                                 |                                                                  |              |
|-----------------------------------------------------------------|------------------------------------------------------------------|--------------|
| Patients with cervical pathology but no further detail reported | <b>2. Localized cervical spine symptoms and/or radiculopathy</b> | <b>Chris</b> |
|-----------------------------------------------------------------|------------------------------------------------------------------|--------------|

|                                                                 |                                                                  |             |
|-----------------------------------------------------------------|------------------------------------------------------------------|-------------|
| Patients with cervical pathology but no further detail reported | <b>2. Localized cervical spine symptoms and/or radiculopathy</b> | <b>Greg</b> |
|-----------------------------------------------------------------|------------------------------------------------------------------|-------------|

|                    |                                                         |             |
|--------------------|---------------------------------------------------------|-------------|
| No detail reported | <b>1. No method of exclusion undertaken or reported</b> | <b>Greg</b> |
|--------------------|---------------------------------------------------------|-------------|

'...shoulder pain referred from vertebral structures diagnosed by spinal clearing tests.'  
Reference to Maitland, 2001

**4. Manual testing**

**Greg**

No detail reported

**1. No method of exclusion undertaken or reported**

**Greg**

History of cervical surgery but no further detail reported

**5. History of cervical surgery**

**Chris**

Patients with cervical radiculopathy but no further detail reported

**2. Localized cervical spine symptoms and/or radiculopathy**

**Chris**

Cervical compression test

**4. Manual testing**

**Chris**

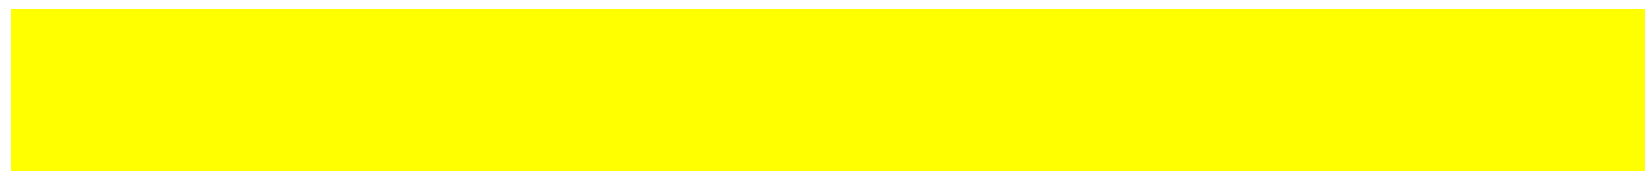

|                    |                                                         |             |
|--------------------|---------------------------------------------------------|-------------|
| No detail reported | <b>1. No method of exclusion undertaken or reported</b> | <b>Emma</b> |
|--------------------|---------------------------------------------------------|-------------|

|                    |                                                         |             |
|--------------------|---------------------------------------------------------|-------------|
| No detail reported | <b>1. No method of exclusion undertaken or reported</b> | <b>Emma</b> |
|--------------------|---------------------------------------------------------|-------------|

|                    |                                                         |              |
|--------------------|---------------------------------------------------------|--------------|
| No detail reported | <b>1. No method of exclusion undertaken or reported</b> | <b>Chris</b> |
|--------------------|---------------------------------------------------------|--------------|

|                                                                                        |                                                                  |             |
|----------------------------------------------------------------------------------------|------------------------------------------------------------------|-------------|
| Signs and symptoms suggestive of cervical radiculopathy but no further detail reported | <b>2. Localized cervical spine symptoms and/or radiculopathy</b> | <b>Emma</b> |
|----------------------------------------------------------------------------------------|------------------------------------------------------------------|-------------|



|                                                                                              |                                                                  |              |
|----------------------------------------------------------------------------------------------|------------------------------------------------------------------|--------------|
| No detail reported                                                                           | <b>1. No method of exclusion undertaken or reported</b>          | <b>Emma</b>  |
| 'blatantly misdiagnosed cervical spine disorders'.<br>No specific details given              | <b>2. Localized cervical spine symptoms and/or radiculopathy</b> | <b>Emma</b>  |
| Patients with evidence of referred pain from cervical spine but no further detail reported   | <b>2. Localized cervical spine symptoms and/or radiculopathy</b> | <b>Chris</b> |
| Patients with numbness or tingling in the upper extremity or previous cervical spine surgery | <b>6. Combined approach (2, 6)</b>                               | <b>Chris</b> |

|                                                                                            |                                                                  |              |
|--------------------------------------------------------------------------------------------|------------------------------------------------------------------|--------------|
| cervical spine surgery but no further detail reported                                      |                                                                  |              |
| Signs and symptoms suggestive of referred pain but no further detail reported              | <b>2. Localized cervical spine symptoms and/or radiculopathy</b> | <b>Chris</b> |
| Evidence of cervical radiculopathy (not specified)                                         | <b>2. Localized cervical spine symptoms and/or radiculopathy</b> | <b>Emma</b>  |
| No detail reported                                                                         | <b>1. No method of exclusion undertaken or reported</b>          | <b>Chris</b> |
| Patients with evidence of referred pain from cervical spine but no further detail reported | <b>2. Localized cervical spine symptoms and/or radiculopathy</b> | <b>Chris</b> |
| Muscle strength and muscle stretch reflexes                                                | <b>3c. Cervical examination; neurological testing</b>            | <b>Chris</b> |

of the neck were assessed but no further detail reported

|                                                                                            |                                                                  |              |
|--------------------------------------------------------------------------------------------|------------------------------------------------------------------|--------------|
| Patients with evidence of referred pain from cervical spine but no further detail reported | <b>2. Localized cervical spine symptoms and/or radiculopathy</b> | <b>Chris</b> |
|--------------------------------------------------------------------------------------------|------------------------------------------------------------------|--------------|

|                                                                                    |                                                                  |             |
|------------------------------------------------------------------------------------|------------------------------------------------------------------|-------------|
| Signs and symptoms suggestive of cervical disorders but no further detail reported | <b>2. Localized cervical spine symptoms and/or radiculopathy</b> | <b>Emma</b> |
|------------------------------------------------------------------------------------|------------------------------------------------------------------|-------------|

|                                                                                  |                                                                  |              |
|----------------------------------------------------------------------------------|------------------------------------------------------------------|--------------|
| Patients with clinical signs of cervical syndrome but no further detail reported | <b>2. Localized cervical spine symptoms and/or radiculopathy</b> | <b>Chris</b> |
|----------------------------------------------------------------------------------|------------------------------------------------------------------|--------------|

|                                                                                                   |                                                                  |              |
|---------------------------------------------------------------------------------------------------|------------------------------------------------------------------|--------------|
| Patients with shoulder pain associated with cervical radiculopathy but no further detail reported | <b>2. Localized cervical spine symptoms and/or radiculopathy</b> | <b>Chris</b> |
|---------------------------------------------------------------------------------------------------|------------------------------------------------------------------|--------------|

|                                                                               |                                                                  |              |
|-------------------------------------------------------------------------------|------------------------------------------------------------------|--------------|
| Patients with referred pain in the shoulder but no further detail reported    | <b>2. Localized cervical spine symptoms and/or radiculopathy</b> | <b>Chris</b> |
| Patients with an injury to the cervical region but no further detail reported | <b>2. Localized cervical spine symptoms and/or radiculopathy</b> | <b>Chris</b> |
| No detail reported                                                            | <b>1. No method of exclusion undertaken or reported</b>          | <b>Chris</b> |
| Patients with radicular signs but no further detail reported                  | <b>2. Localized cervical spine symptoms and/or radiculopathy</b> | <b>Chris</b> |
| No detail reported                                                            | <b>1. No method of exclusion undertaken or reported</b>          | <b>Greg</b>  |
| Patients with severe neck pain were excluded but no further detail            | <b>2. Localized cervical spine symptoms and/or radiculopathy</b> | <b>Chris</b> |

|                                                                                                   |                                                                  |              |
|---------------------------------------------------------------------------------------------------|------------------------------------------------------------------|--------------|
| but no further detail reported                                                                    | <b>radiculopathy</b>                                             |              |
| Patients with cervical spine problems detailed as reporting more neck pain than shoulder pain     | <b>2. Localized cervical spine symptoms and/or radiculopathy</b> | <b>Chris</b> |
| Cervico-throacic related pain (positive cervical compression test; excessive kyphosis, scoliosis) | <b>6. Combined approach (2, 4)</b>                               | <b>Emma</b>  |
| Signs and symptoms suggestive of cervical disorders but no further detail reported                | <b>2. Localized cervical spine symptoms and/or radiculopathy</b> | <b>Emma</b>  |

No detail reported

**1. No method of exclusion  
undertaken or reported**

**Chris**

Shoulder symptoms  
reproduced with neck  
movements or a positive  
test for the foramina  
intervertebralia (pain or  
neurological symptoms  
during manual extension  
combined with manual  
lateral flexion and  
rotation toward the  
tested side)

**6. Combined approach (3b, 4)**

**Emma**

Shoulder symptoms  
reproduced with neck  
movements and/ or  
positive Spurling's test

**6. Combined approach (3b, 4)**

**Chris**

Exclusion included '...  
cervical radiculopathy...'.  
No further detail given

**2. Localized cervical spine  
symptoms and/or  
radiculopathy**

**Greg**

No further detail given      **radiculopathy**

Primary complaint of neck pain and/ or reproduction of shoulder pain with cervical rotation, axial compression or Spurling's test      **6. Combined approach (3b, 4)**      **Chris**

Signs and symptoms suggestive of cervical disorders but no further detail reported      **2. Localized cervical spine symptoms and/or radiculopathy**      **Tom**

No detail reported      **1. No method of exclusion undertaken or reported**      **Greg**

|                                                                                                                                                                                 |                                                             |             |
|---------------------------------------------------------------------------------------------------------------------------------------------------------------------------------|-------------------------------------------------------------|-------------|
| No detail reported                                                                                                                                                              | <b>1. No method of exclusion undertaken or reported</b>     | <b>Greg</b> |
| Reproduction of shoulder pain on active or passive cervical spine movements.                                                                                                    | <b>3b. Cervical examination; movement, AROM and/or PROM</b> | <b>Emma</b> |
| Exclusion criteria '... reproduction of symptoms with active or passive cervical movements...'.<br>Assessment process included '...physical examination of the cervical spine.' | <b>6. Combined approach (3a, 3b)</b>                        | <b>Greg</b> |
| Exclusion criteria included '...ruled out                                                                                                                                       | <b>2. Localized cervical spine symptoms and/or</b>          | <b>Greg</b> |



cervical radiculopathy or **radiculopathy**  
radiculitis...' No further  
detail given.

|                                                                                                                           |                                                                          |             |
|---------------------------------------------------------------------------------------------------------------------------|--------------------------------------------------------------------------|-------------|
| Exclusion criteria '...<br>cervical spondylosis with<br>referring pain to the<br>shoulder...'. No further<br>detail given | <b>2. Localized cervical spine<br/>symptoms and/or<br/>radiculopathy</b> | <b>Greg</b> |
|---------------------------------------------------------------------------------------------------------------------------|--------------------------------------------------------------------------|-------------|

|                                                                                                                                                                                                    |                                            |              |
|----------------------------------------------------------------------------------------------------------------------------------------------------------------------------------------------------|--------------------------------------------|--------------|
| Cervical pain at rest, or<br>cervical pain during<br>active movements, or<br>reproduction of shoulder<br>pain during active<br>cervical movements or<br>with overpressure to the<br>cervical spine | <b>6. Combined approach (2, 3b,<br/>4)</b> | <b>Chris</b> |
|----------------------------------------------------------------------------------------------------------------------------------------------------------------------------------------------------|--------------------------------------------|--------------|

|                                                                |                                                                     |             |
|----------------------------------------------------------------|---------------------------------------------------------------------|-------------|
| Cervical repeated<br>movement testing<br>affects shoulder pain | <b>3b. Cervical examination;<br/>movement, AROM and/or<br/>BBOM</b> | <b>Greg</b> |
|----------------------------------------------------------------|---------------------------------------------------------------------|-------------|

|                                                                                                                 |                                                                  |              |
|-----------------------------------------------------------------------------------------------------------------|------------------------------------------------------------------|--------------|
| affects shoulder pain and / or range of movement. No further detail provided                                    | <b>PROM</b>                                                      |              |
| Cervical repeated movement testing affects shoulder pain and / or range of movement. No further detail provided | <b>3b. Cervical examination; movement, AROM and/or PROM</b>      | <b>Greg</b>  |
| Exclusion criteria '... cervical radiculopathy...' No further detail given                                      | <b>2. Localized cervical spine symptoms and/or radiculopathy</b> | <b>Greg</b>  |
| Shoulder pain produced by cervical assessment but no further detail reported                                    | <b>3a. Cervical examination; unspecified</b>                     | <b>Chris</b> |
| Signs and symptoms suggestive of cervical disorders but no further                                              | <b>2. Localized cervical spine symptoms and/or radiculopathy</b> | <b>Tom</b>   |

disorders but no further detail reported

**radiculopathy**

No detail reported

**1. No method of exclusion undertaken or reported**

**Chris**

No detail reported

**1. No method of exclusion undertaken or reported**

**Chris**

No current or previous complaints of neck pain within the past year.

Patients with shoulder pain were excluded if they had symptoms of paresthesia or neurological deficits,

had a primary complaint of neck or thoracic pain;

**2. Localized cervical spine symptoms and/or radiculopathy**

**Tom**

**6. Combined approach (2, 3b, 4)**

**Greg**

signs of cervical nerve root involvement; reproduction of shoulder or arm pain with cervical rotation to the ipsilateral side, axial compression, or Spurling's Test;

Excluded if cervical spine involvement in the disorder could be demonstrated. This was defined by active neck movement reproducing pain in the shoulder region.

- cervical or shoulder symptoms reproduced by a cervical - screening exam; symptoms of numbness or tingling in the upper extremity

**3b. Cervical examination; movement, AROM and/or PROM**

**Greg**

**6. Combined approach (2, 3a)**

**Greg**

Shoulder pain associated with radicular pain of cervical origin but no further detail reported

**2. Localized cervical spine symptoms and/or radiculopathy**

**Chris**

Nil mention of method for excluding Cervical spine involvement however in the analysis the authors do mention that 47 people were excluded due to cervicothoracic involvement

**1. No method of exclusion undertaken or reported**

Cervical spine was examined but no further detail reported

**3a. Cervical examination; unspecified**

**Chris**

Normal neck with no neurological signs but no further detail reported

**2. Localized cervical spine symptoms and/or radiculopathy**

**Chris**

Nil mention of method for excluding Cervical spine involvement however in the analysis the authors do mention that 5 people were excluded due to cervical involvement

**2. Localized cervical spine symptoms and/or radiculopathy**

**Greg**

No detail reported  
however 2 people were  
excluded due to  
'Cervical pathology'.

**2. Localized cervical spine  
symptoms and/or  
radiculopathy**

**Greg**

No detail reported

**1. No method of exclusion  
undertaken or reported**

**Greg**

No detail reported

**1. No method of exclusion  
undertaken or reported**

**Chris**

No detail reported

**1. No method of exclusion  
undertaken or reported**

**Greg**

Exclusion criteria

**2. Localized cervical spine**

**Greg**

included '... cervical rhizopathy..'. No further detail given.

**symptoms and/or radiculopathy**

|                                                                                                                        |                                                                  |             |
|------------------------------------------------------------------------------------------------------------------------|------------------------------------------------------------------|-------------|
| Reproduction of shoulder symptoms with cervical spine examinationReproduction of shoulder symptoms with cervical spine | <b>3a. Cervical examination; unspecified</b>                     | <b>Tom</b>  |
| ...cervical myofascial pain syndrome, radicular pain...'. No further detail given                                      | <b>2. Localized cervical spine symptoms and/or radiculopathy</b> | <b>Greg</b> |
| Exclusion criteria included '...cervical myofascial pain syndrome, radicular                                           | <b>2. Localized cervical spine symptoms and/or radiculopathy</b> | <b>Greg</b> |

syndrome, radicular  
pain...'. No further detail  
given

No detail reported

**1. No method of exclusion  
undertaken or reported**

**Tom**

No detail reported

**1. No method of exclusion  
undertaken or reported**

**Greg**

Signs and symptoms  
suggestive of cervical  
disorders but no further  
detail reported

**2. Localized cervical spine  
symptoms and/or  
radiculopathy**

**Chris**

Exclusion criteria  
included'... history of  
disease in ... cervical  
region...' No further  
detail given

**2. Localized cervical spine  
symptoms and/or  
radiculopathy**

**Greg**



|                                                                                                                                                                                         |                                                                  |              |
|-----------------------------------------------------------------------------------------------------------------------------------------------------------------------------------------|------------------------------------------------------------------|--------------|
| Exclusion criteria included 'cervical radiculopathy and reproduction of symptoms during the cervical screening examination. No further detail of what the 'screening' test consisted of | <b>6. Combined approach (2, 3a)</b>                              | <b>Greg</b>  |
| ... cervical problems accompanied by radicular symptoms...'. No further detail given                                                                                                    | <b>2. Localized cervical spine symptoms and/or radiculopathy</b> | <b>Greg</b>  |
| Presence of neck pain but no further detail reported                                                                                                                                    | <b>2. Localized cervical spine symptoms and/or radiculopathy</b> | <b>Chris</b> |
| Exclusion criteria '... cervical radiculopathy...'. No further detail given                                                                                                             | <b>2. Localized cervical spine symptoms and/or radiculopathy</b> | <b>Greg</b>  |

further detail given

Exclusion criteria included '...History of Cervical pain and Cervical radiculopathy...'. No further detail given

**2. Localized cervical spine symptoms and/or radiculopathy**

**Greg**

No detail reported

**1. No method of exclusion undertaken or reported**

**Greg**

Cervical spine symptoms

**2. Localized cervical spine symptoms and/or radiculopathy**

**Tom**

No detail reported

**1. No method of exclusion undertaken or reported**

**Tom**

Patients with cervical radiculopathy but no further detail reported

**2. Localized cervical spine symptoms and/or radiculopathy**

**Chris**

Signs and symptoms suggestive of referred pain but no further detail reported

**2. Localized cervical spine symptoms and/or radiculopathy**

**Tom**

... extrinsic diseases such as cervical spondylosis with referring pain to the shoulder.' No further detail given

**2. Localized cervical spine symptoms and/or radiculopathy**

**Greg**

Shoulder symptoms reproduced during active cervical spine movements or during palpation of cervical joints; paresthesia in the affected upper limb

**6. Combined approach (2, 3b, 4)**

**Tom**

Only exclusion related to **5. History of cervical surgery** Greg  
previous 'neck' surgery.  
No further details given
